# Supplementary material
Source: PubMed Central journal article supplement (PMC5832060)
Supplement: NIHMS927398-supplement-1.pdf [file NIHMS927398-supplement-1.pdf]

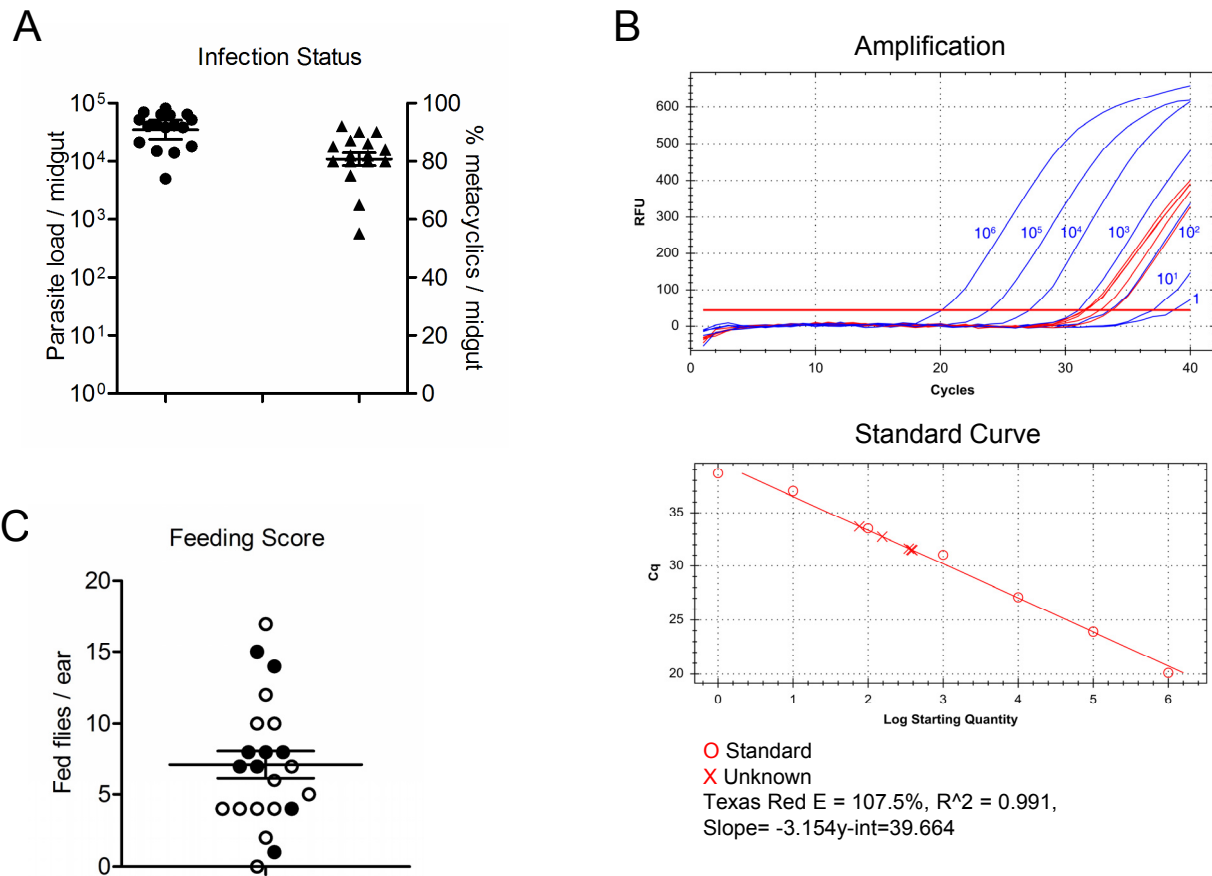

**Figure S1. Infection status and feeding behavior of *Leishmania donovani*-infected *Lutzomyia longipalpis* sand flies used for transmission to mice. Related to Figure 1. (A)** Total parasite burden and percent metacyclics per midgut on the day of transmission. **(B)** Amplification of *L. donovani* parasites from DNA co-extracted after spiking mouse ears with known numbers of parasites. The parasite burden in unknown samples (x) was quantified by generating a standard curve (o) of the cycle number (Cq) that corresponds to the number of spiked *L. donovani* parasites. Plots are representative of three independent experiments. **(C)** The number of flies that fed on mice processed at five (open circles) and 30 (closed circles) weeks post-transmission as a measure of homogeneity of sand fly feeding behavior. Twenty infected sand flies were used per mouse ear. Data are representative of more than eight independent experiments ( $n \geq 8$  mice ears per condition). Bar indicates the geometric mean for the parasite load with 95% CI or the mean  $\pm$  1 SEM for percent metacyclics and feeding score.

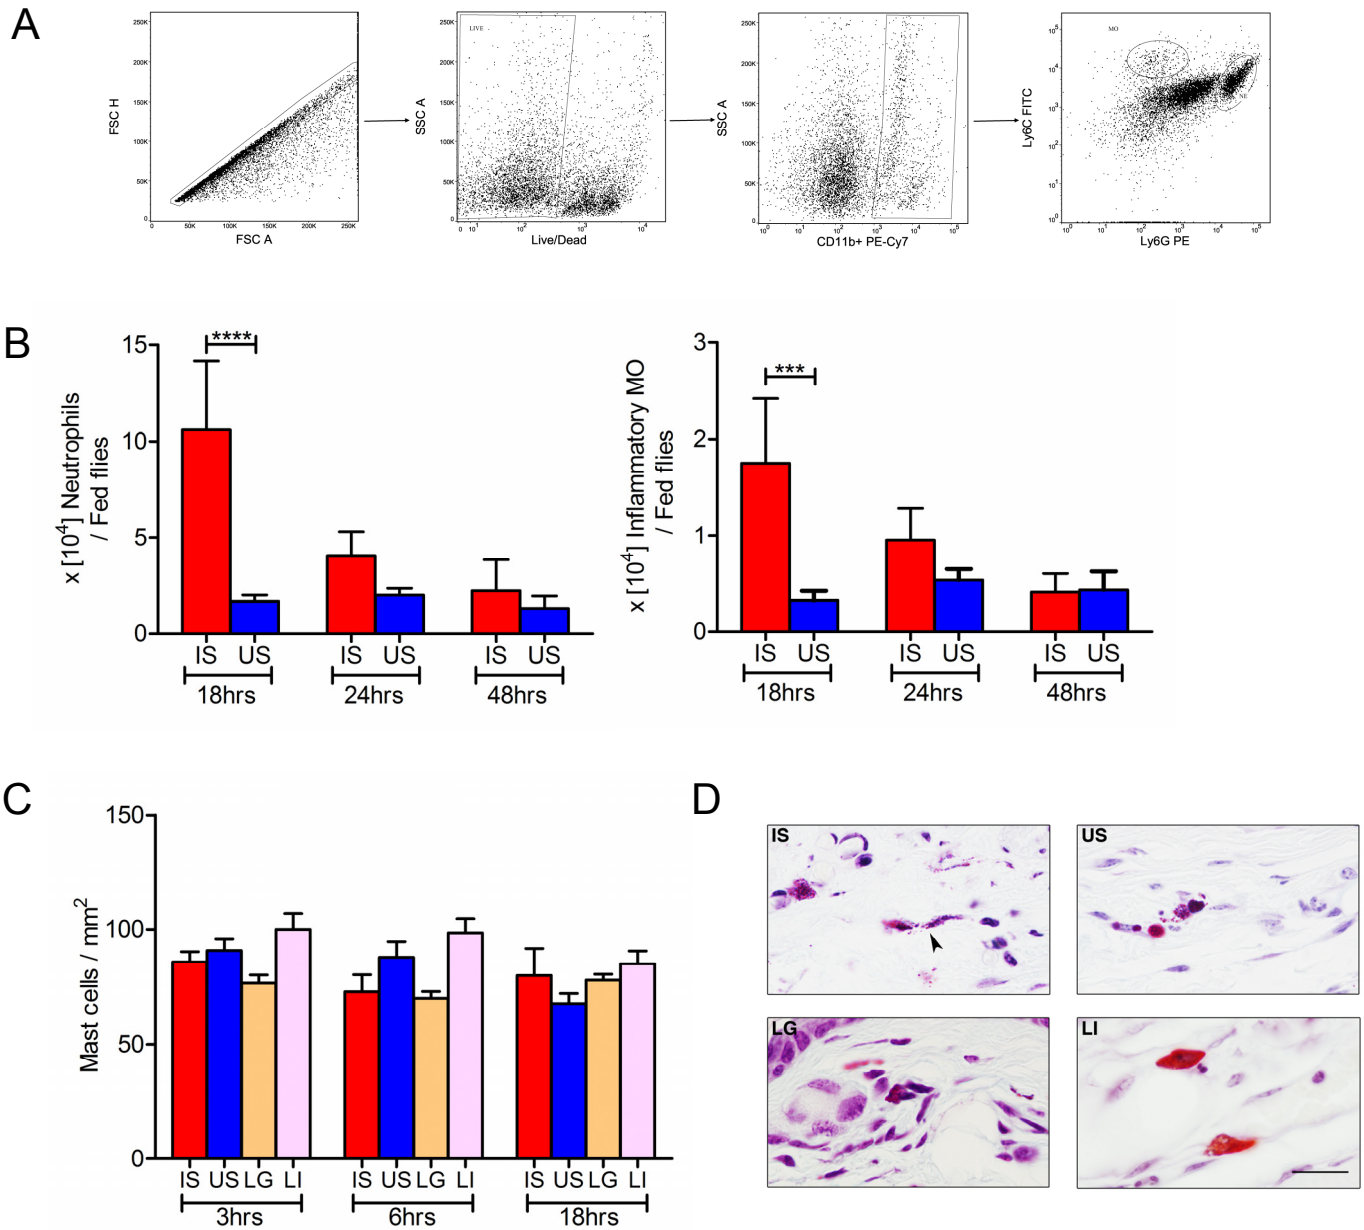

**Figure S2. Related to Figure 1. Major leukocyte populations observed at the bite site following vector-transmitted *L. donovani* parasites. Related to Figure 1. (A) Gating strategy to identify neutrophils and inflammatory monocytes using flow cytometry. (B) Flow cytometric analysis of neutrophils and inflammatory monocytes in individual mice ears. Data are representative of two independent experiments (n = 6 mice ears per condition per timepoint). Data normalized by the number of fed flies. (C and D) Mast cells in mice ears 3-18 hours after exposure to 20 infected (IS) or uninfected (US) sand flies, intradermal co-inoculation with 10<sup>5</sup> metacyclic parasites plus an extract of one salivary gland (LG), and intradermal injection with 10<sup>5</sup> metacyclic parasites (LI). (C) Mast cell count per mm<sup>2</sup> from at least six fields from ear sections stained with Toluidine blue. Data are representative of four independent experiments (n ≥ 5 mice ears per condition per timepoint). (D) Close-up of mast cells stained with Alcian Blue/Safranin. Arrowhead and arrow point to a degranulated and a non-degranulated mast cell, respectively. Scale bar indicates 20µm. Pictures and data are representative of two to four independent experiments (n ≥ 3 mice ears per condition). Error bars, ± SEM; \*\*\*P < 0.001, \*\*\*\*P < 0.0001. Flow cytometry data was analyzed using a one-way ANOVA followed by Fisher's least significant difference post-test.**

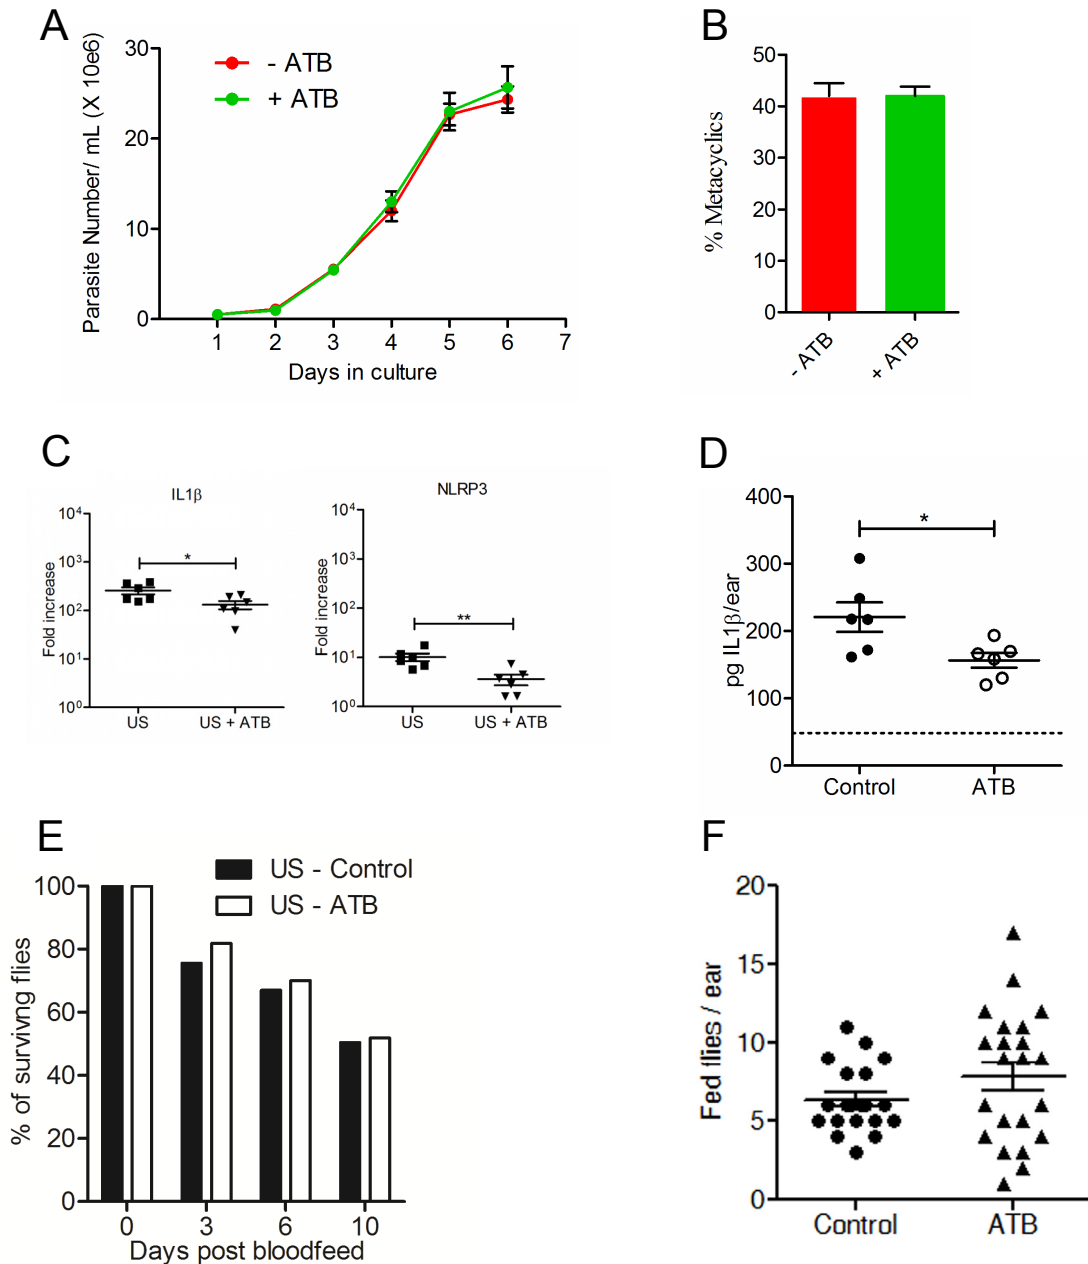

**Figure S3. Sand fly midgut microbiota primes the NLRP3 inflammasome. Related to Figure 4.** *In vitro* growth (A) and percent metacyclics (B) of *L. donovani* parasites at day 6 in the presence or absence of a cocktail of antibiotics (ATB) composed of 100U/ml Penicillin, 50mg/ml Gentamicin and 4µg/ml Clindamycin. Data are representative of two independent experiments. The mean ± 1 SEM is shown for parasite growth and percent metacyclics. (C-F) Sand flies were provided a cocktail of five antibiotics for 11 days after feeding on uninfected blood (US). (C and D) Mice ear lysates were processed six hours after exposure to 20 uninfected (US) or antibiotic-treated uninfected (US+ATB) sand flies. Data are representative of two independent experiments (n = 6 mice ears per condition). (C) Expression of IL1β and NLRP3 determined by qPCR from individual mice ears. (D) Ex-vivo IL1β protein levels measured by ELISA. Dotted line represents endogenous IL1β levels in naïve samples. Survival (E) and feeding behavior (F) of antibiotic-treated sand flies compared to controls. Data are pooled from two independent experiments (n ≥ 20 mice ears per condition for F). Error bars, ± 1 SEM; \*P < 0.05; \*\*P < 0.01; unpaired two-tailed t test.

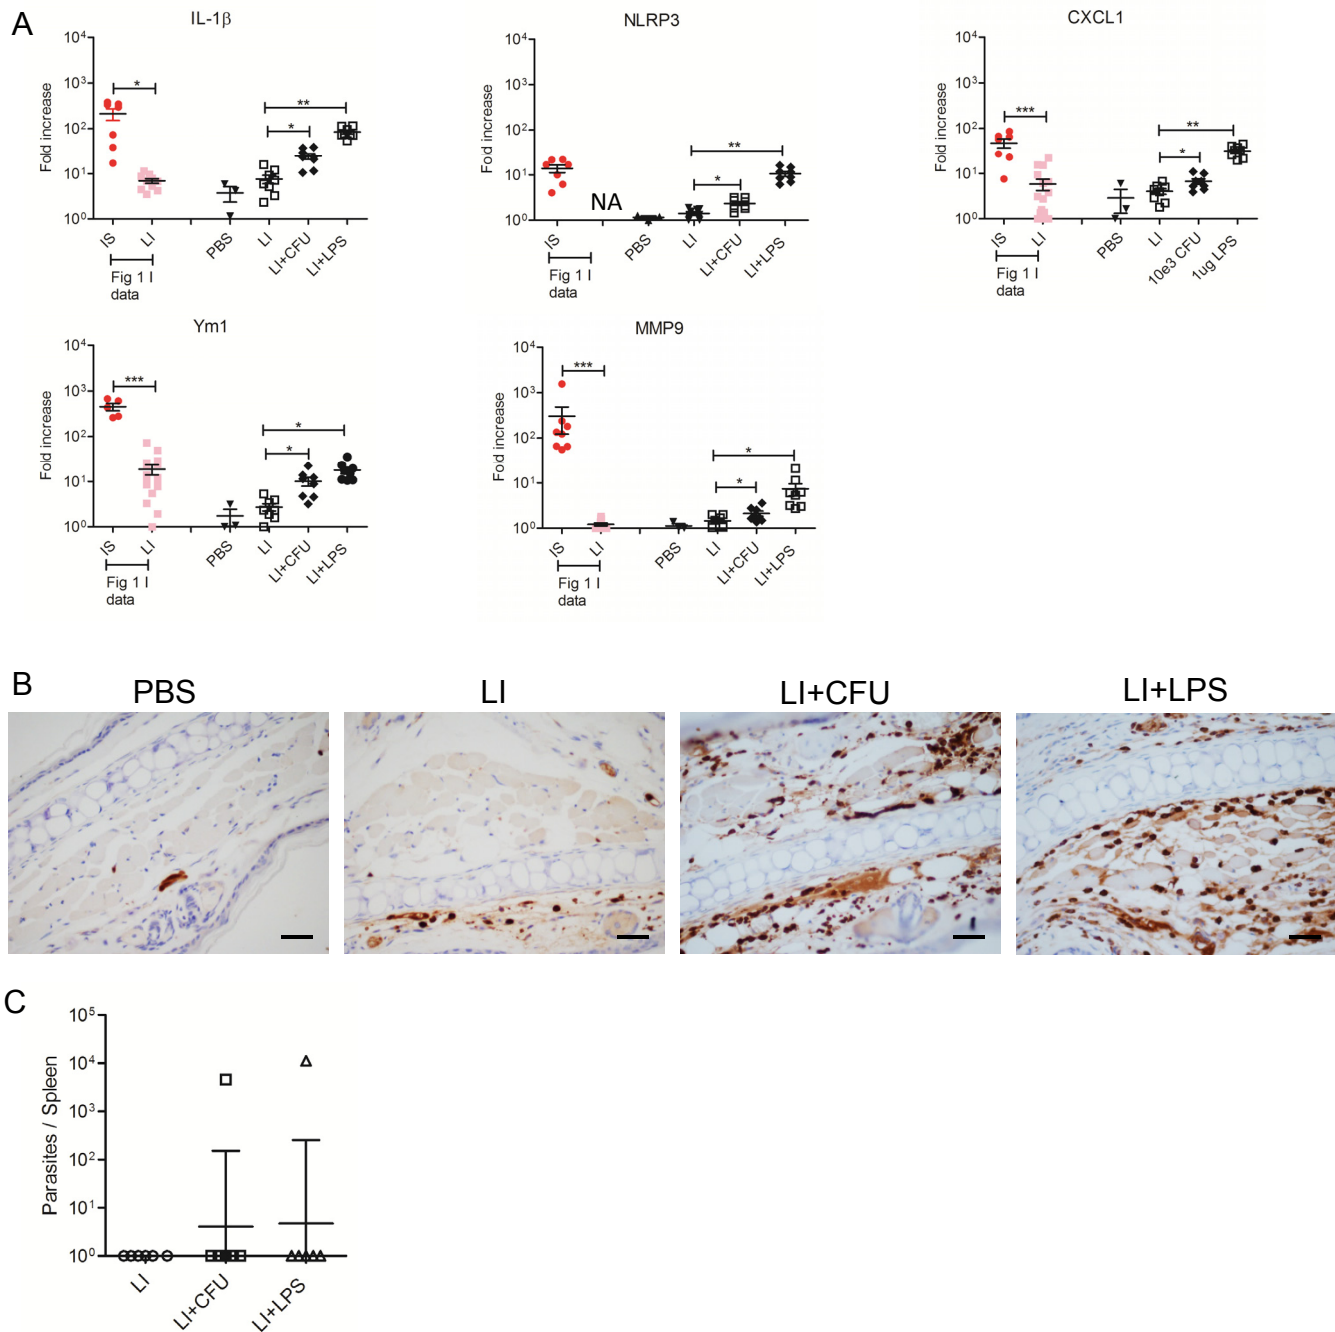

**Figure S4. Co-injection of *L. donovani* parasites with live bacteria or lipopolysaccharide does not fully reproduce the immune response observed after infected bites. Related to Figure 4. (A-C)** Mice ears were intradermally injected with  $10^5$  metacyclic parasites alone (LI) or with either  $10^3$  live *Solibacillus* bacteria (LI+CFU), recovered from a *Leishmania*-positive bite site on agar, or 1  $\mu$ g of lipopolysaccharide (LI+LPS). **(A and B)** Mice ear lysates were processed six hours after intradermal injection. **(A)** Expression of select key markers of the immune response observed after infected sand fly bites determined by qPCR for individual mice ears. Cumulative data are shown from two independent experiments ( $n \geq 3$  mice ears per condition). Data from Figure 1I was included to facilitate a direct comparison. **(B)** Paraffin-embedded sections of mice ears stained with anti-Gr1 (Clone, RB6-8C5). Pictures are representative of two independent experiments ( $n \geq 4$  mice ears per condition). **(C)** Parasite burden determined by qPCR in spleens of individual mice three weeks after infection. Cumulative data are shown from two independent experiments ( $n = 6$  mice per group). PBS, negative control; NA, not available; Error bars,  $\pm$  SEM; \* $P < 0.05$ , \*\* $P < 0.01$ , \*\*\* $P < 0.001$ ; unpaired two-tailed  $t$  test.

**Table S1. Densitometry readings of band intensity for inflammasome proteins detected in mice ear lysates after infected (IS), uninfected (US) or antibiotic-treated (IS+ATB) sand fly bites. Naïve indicates baseline protein expression. Related to Figures 2 and 4**

| <b>Proteins</b>   | <b>Naive</b> | <b>IS</b> | <b>US</b>     | <b>Comments</b>                                                   |
|-------------------|--------------|-----------|---------------|-------------------------------------------------------------------|
| NLRP-3            | 0.251198     | 0.928639  | 0.55991       | Bands normalized to $\beta$ -actin levels. Related to Figure 2F   |
| Pro-IL1 $\beta$   | 0.404768     | 1.038266  | 0.770873      |                                                                   |
| Pro-Caspase 1     | 0.271122     | 1.8706778 | 0.702252      |                                                                   |
| Cleaved Caspase 1 | 0.015966     | 0.268388  | 0.012534      |                                                                   |
| NLRP-3            | 0.208404     | 2.158782  | 0.702252      | Bands normalized to ASC <sup>a</sup> levels. Related to Figure 2G |
| <b>Proteins</b>   | <b>Naive</b> | <b>IS</b> | <b>IS+ATB</b> | <b>Comments</b>                                                   |
| NLRP-3            | 0.578143     | 2.254674  | 0.744925      | Bands normalized to $\beta$ -actin levels. Related to Figure 4I   |
| Pro-Caspase1      | 0.617353     | 1.183604  | 0.987139      |                                                                   |
| Cleaved Caspase 1 | 0.214619     | 0.371863  | 0.241338      |                                                                   |
| Pro-IL-1 $\beta$  | 0.325763     | 1.122318  | 0.548507      |                                                                   |
| NLRP-3            | 0.051822     | 0.3211    | 0.062618      | Bands normalized to ASC <sup>a</sup> levels. Related to Figure 4J |

<sup>a</sup> ASC, apoptosis-associated speck-like protein containing a CARD domain

**Table S2. List of genes amplified from RNA extracted from mice ears after exposure to infected or uninfected sand fly bites, or after intradermal injection of *Leishmania* with or without salivary gland sonicate. Related to main Figures 1 and 2, and supplemental Figures S3 and S4**

| Target Gene    | Source             | Assay ID      |
|----------------|--------------------|---------------|
| CXCL1          | Applied Biosystems | Mm04207460_m1 |
| CCL2           | Applied Biosystems | Mm99999056_m1 |
| CCL3           | Applied Biosystems | Mm00441258_m1 |
| CCL17          | Applied Biosystems | Mm01244826_g1 |
| CCL22          | Applied Biosystems | Mm00436439_m1 |
| YM1            | Applied Biosystems | Mm00657889_mH |
| MRC1           | Applied Biosystems | Mm00485148_m1 |
| ILRN1          | Applied Biosystems | Mm00446186_m1 |
| TGF- $\beta$   | Applied Biosystems | Mm01178819_m1 |
| IL-10          | Applied Biosystems | Mm00439614_m1 |
| IL-6           | Applied Biosystems | Mm00446190_m1 |
| MMP9           | Applied Biosystems | Mm00600163_m1 |
| IL-1 $\beta$   | Applied Biosystems | Mm00434228_m1 |
| NOS2           | Applied Biosystems | Mm00440502_m1 |
| TNF- $\alpha$  | Applied Biosystems | Mm00443258_m1 |
| NLRP3          | Applied Biosystems | Mm00840904_m1 |
| IFN- $\beta$ 1 | Applied Biosystems | Mm00439552_s1 |
| IL-12B         | Applied Biosystems | Mm00434174_m1 |
| IFN $\gamma$   | Applied Biosystems | Mm01168134_m1 |
| IL-4           | Applied Biosystems | Mm00445259_m1 |
| IL-13          | Applied Biosystems | Mm99999190_m1 |
| GAPDH          | Applied Biosystems | Mm99999915_g1 |

**Video S1. *L. donovani*-infected sand flies probing a warmed LB/Agar plate. Related to Figure 3.** A warmed LB/Agar plate is overturned onto a meshed surface of a custom-made feeder containing infected flies. Arrows point to two infected sand flies probing the LB/Agar.
